# Supplementary material
Source: MDPI journal article supplement (https://www.mdpi.com/2076-3417/14/9/3715)
Supplement: s1 [file s1]

**Table S1.** Price of reagents used to compose Zarrouk medium obtained on March, 2023, from the manufacturer's website Sigma-Aldrich Brazil.

| Reagent                                                | Reagent price per<br>gram<br>(\$US g <sup>-1</sup> ) | Reagent mass into cultivation<br>medium<br>(g L <sup>-1</sup> ) | Reagent price per medium<br>liter<br>(\$US L <sup>-1</sup> ) |
|--------------------------------------------------------|------------------------------------------------------|-----------------------------------------------------------------|--------------------------------------------------------------|
| IAA                                                    | 5.263                                                | 0.00010                                                         | 0.00053                                                      |
| NaHCO <sub>3</sub>                                     | 0.021                                                | 16.80000                                                        | 0.34822                                                      |
| K <sub>2</sub> HPO <sub>4</sub>                        | 0.236                                                | 0.50000                                                         | 0.11819                                                      |
| NaNO <sub>3</sub>                                      | 0.134                                                | 2.50000                                                         | 0.33541                                                      |
| K <sub>2</sub> SO <sub>4</sub>                         | 0.187                                                | 1.00000                                                         | 0.18739                                                      |
| NaCl                                                   | 0.013                                                | 1.00000                                                         | 0.01270                                                      |
| MgSO <sub>4</sub> ·7H <sub>2</sub> O                   | 0.154                                                | 0.20000                                                         | 0.03082                                                      |
| CaCl <sub>2</sub> ·2H <sub>2</sub> O                   | 0.100                                                | 0.04000                                                         | 0.00402                                                      |
| FeSO <sub>4</sub> ·7H <sub>2</sub> O                   | 0.075                                                | 0.01000                                                         | 0.00075                                                      |
| EDTA                                                   | 0.333                                                | 0.08000                                                         | 0.02661                                                      |
| H <sub>3</sub> Bo <sub>3</sub>                         | 0.070                                                | 0.00286                                                         | 0.00020                                                      |
| MnCl <sub>2</sub> ·4H <sub>2</sub> O                   | 0.288                                                | 0.00181                                                         | 0.00052                                                      |
| ZnSO <sub>4</sub> ·7H <sub>2</sub> O                   | 0.095                                                | 0.00022                                                         | 0.00002                                                      |
| CuSO <sub>4</sub> ·5H <sub>2</sub> O                   | 0.124                                                | 0.00008                                                         | 0.00001                                                      |
| Na <sub>2</sub> MoO <sub>4</sub> ·2H <sub>2</sub> O    | 1.037                                                | 0.00002                                                         | 0.00002                                                      |
| NH <sub>4</sub> VO <sub>3</sub>                        | 0.507                                                | 0.00002                                                         | 0.00001                                                      |
| KCr(SO <sub>4</sub> ) <sub>2</sub> ·12H <sub>2</sub> O | 0.573                                                | 0.00010                                                         | 0.00006                                                      |
| Na <sub>2</sub> WO <sub>4</sub> ·2H <sub>2</sub> O     | 0.760                                                | 0.00002                                                         | 0.00001                                                      |
| Co(NO <sub>3</sub> ) <sub>2</sub> ·6H <sub>2</sub> O   | 0.594                                                | 0.00004                                                         | 0.00003                                                      |
